# Supplementary material for: Effects of Dietary Supplementation with Protected Sodium Butyrate on Gut Microbiota in Growing-Finishing Pigs
Source: MDPI journal article supplement (doi:10.3390/ani11072137), 2021-07-19
Supplement: s1 [file s1]

**Table S1.** Ingredient and nutrient contents of the three basal diets.

| <b>Ingredients (%)</b>                 | <b>Starting feed</b> | <b>Growing feed</b> | <b>Finishing feed</b> |
|----------------------------------------|----------------------|---------------------|-----------------------|
| Maize                                  | 20.000               | 37.278              | 36.113                |
| Wheat                                  | 30.000               | 28.698              | 35.000                |
| Soy                                    | 20.609               | 13.032              | 10.448                |
| Barley                                 | 14.303               | -                   | -                     |
| Sunflower expeller                     | -                    | 8.000               | 8.000                 |
| Biscuit cereal meal                    | 10.000               | 8.000               | 6.000                 |
| Fat mix                                | 1.822                | 1.704               | 1.511                 |
| Calcium carbonate (CaCO <sub>3</sub> ) | 0.794                | 0.760               | 0.890                 |
| L-Lysine                               | 0.751                | 0.882               | 0.692                 |
| Dicalcium phosphate                    | 0.586                | 0.697               | 0.571                 |
| Sodium chloride                        | 0.300                | 0.300               | 0.282                 |
| Vitamin-mineral premix*                | 0.200                | 0.200               | 0.200                 |
| L-Threonine                            | 0.174                | 0.178               | 0.188                 |
| Sodium bicarbonate                     | 0.130                | -                   | -                     |
| Xylanase                               | 0.100                | 0.100               | 0.100                 |
| Liquid MHA-FA                          | 0.194                | 0.122               | 0.047                 |
| Phytase                                | 0.015                | 0.015               | 0.015                 |
| L-Tryptophan                           | 0.017                | 0.029               | 0.009                 |
| <b>Nutritional parameters (%)</b>      |                      |                     |                       |
| Moisture                               | 12.376               | 12.325              | 12.269                |
| Crude protein                          | 17.431               | 16.050              | 15.050                |
| Crude fat                              | 4.300                | 5.010               | 4.667                 |
| Linoleic acid                          | 1.058                | 1.401               | 1.332                 |
| Crude fiber                            | 3.287                | 4.120               | 4.315                 |
| Acid detergent fiber                   | 4.314                | 5.207               | 5.260                 |
| Neutral detergent fiber                | 11.670               | 12.577              | 12.928                |
| Starch                                 | 43.445               | 45.549              | 47.948                |
| Sugar                                  | 4.265                | 3.712               | 3.429                 |
| Ash                                    | 4.596                | 4.256               | 4.135                 |
| Calcium                                | 0.600                | 0.600               | 0.600                 |
| Digestible calcium                     | 0.222                | 0.234               | 0.232                 |
| Total phosphorous                      | 0.465                | 0.512               | 0.482                 |
| Available phosphorous                  | 0.211                | 0.226               | 0.202                 |
| Digestible phosphorous                 | 0.280                | 0.280               | 0.260                 |
| Phytic phosphorous                     | 0.221                | 0.254               | 0.252                 |
| Potassium                              | 0.705                | 0.655               | -                     |
| Sodium                                 | 0.225                | 0.184               | 0.170                 |
| Chlorine                               | 0.278                | 0.270               | 0.250                 |
| Chlorides                              | 0.467                | 0.451               | 0.417                 |
| Electrolyte balance                    | 200.000              | 171.616             | 160.764               |
| Lysine                                 | 1.179                | 1.092               | 0.937                 |
| Methionine                             | 0.407                | 0.370               | 0.294                 |
| Methionine-Cystine                     | 0.707                | 0.651               | 0.570                 |
| Threonine                              | 0.768                | 0.717               | 0.627                 |
| Tryptophan                             | 0.219                | 0.204               | 0.175                 |
| Digestible protein                     | 15.045               | 13.750              | 13.000                |
| Digestible lysine                      | 1.080                | 1.000               | 0.850                 |
| Digestible methionine                  | 0.380                | 0.341               | 0.273                 |

**Table S1.** *Cont.*

| <b>Nutritional parameters (%)</b> | <b>Starting feed</b> | <b>Growing feed</b> | <b>Finishing feed</b> |
|-----------------------------------|----------------------|---------------------|-----------------------|
| Methionine + Cysteine             | 0.637                | 0.580               | 0.501                 |
| Digestible threonine              | 0.680                | 0.630               | 0.544                 |
| Digestible tryptophan             | 0.194                | 0.180               | 0.153                 |
| Digestible leucine                | 1.154                | 1.083               | 1.072                 |
| Digestible isoleucine             | 0.614                | 0.541               | 0.522                 |
| Digestible valine                 | 0.690                | 0.625               | 0.604                 |
| Digestible phenylalanine          | 0.725                | 0.643               | 0.622                 |
| Digestible tyrosine               | 0.511                | 0.442               | 0.430                 |
| Phenylalanine + Tyrosine          | 1.236                | 1.085               | 1.053                 |
| Digestible histidine              | 0.379                | 0.346               | 0.339                 |
| <b>Net energy (Mcal/kg)</b>       | <b>2.375</b>         | <b>2.424</b>        | <b>2.421</b>          |

\*Provided per kilogram of complete diet: 3,250,000 IU vitamin A, 750,000 IU vitamin D<sub>3</sub>, 7.5 g vitamin E, 1.5 g vitamin B<sub>2</sub>, 500 mg vitamin B<sub>6</sub>, 8.5 mg vitamin B<sub>12</sub>, 7.5 g nicotinic acid, 4 g calcium pantothenate, 50 g choline chloride, 50 g Zn, 25 g Mn, 125 g Fe, 5 g Cu, 100 mg Se, 1 g butylated hydroxytoluene, 500 mg I.
